# Supplementary material for: Divergent abiotic spectral pathways unravel pathogen stress signals across species
Source: PubMed Central journal article supplement (PMC8526582; doi:10.1038/s41467-021-26335-3), 2021-10-19
Supplement: 41467_2021_26335_MOESM1_ESM.pdf [file 41467_2021_26335_MOESM1_ESM.pdf]

## Supplementary Material

**Supplementary Table 1.** Narrow-band hyperspectral indices derived from hyperspectral and thermal data included in this study and their formulations.

| Hyperspectral indices                                                                                    | Equation                                                                                                                                                                        | Reference                                            |
|----------------------------------------------------------------------------------------------------------|---------------------------------------------------------------------------------------------------------------------------------------------------------------------------------|------------------------------------------------------|
| <b>Structural indices</b>                                                                                |                                                                                                                                                                                 |                                                      |
| Normalised Difference Veg. Index                                                                         | $NDVI = (R_{800} - R_{670}) / (R_{800} + R_{670})$                                                                                                                              | Rouse <i>et al.</i> (1974) <sup>1</sup>              |
| Renormalised Difference Veg. Index                                                                       | $RDVI = (R_{800} - R_{670}) / \sqrt{(R_{800} + R_{670})}$                                                                                                                       | Roujean & Breon (1995) <sup>2</sup>                  |
| Optimised Soil-Adjusted Veg. Index                                                                       | $OSAVI = ((1 + 0.16) \cdot (R_{800} - R_{670}) / (R_{800} + R_{670} + 0.16))$                                                                                                   | Rondeaux <i>et al.</i> (1996) <sup>3</sup>           |
| Modified Soil-Adjusted Vegetation Index                                                                  | $MSAVI = \frac{2 \cdot R_{800} + 1 - \sqrt{(2 \cdot R_{800} + 1)^2 - 8(R_{800} - R_{670})}}{2}$                                                                                 | Qi <i>et al.</i> (1994) <sup>4</sup>                 |
| Triangular Vegetation Index                                                                              | $TVI = 0.5 \cdot [120 \cdot (R_{750} - R_{550}) - 200 \cdot (R_{670} - R_{550})]$                                                                                               | Broge & Leblanc (2001) <sup>5</sup>                  |
| Modified Triangular Veg. Index 1                                                                         | $MTVI1 = \frac{1.2[1.2(R_{800} - R_{550}) - 2.5(R_{670} - R_{550})]}{1.5[1.2(R_{800} - R_{550}) - 2.5(R_{670} - R_{550})]}$                                                     | Haboudane <i>et al.</i> (2004) <sup>6</sup>          |
| Modified Triangular Veg. Index 2                                                                         | $MTVI2 = \frac{\sqrt{(2R_{800} + 1)^2 - (6R_{800} - 5\sqrt{R_{670}}) - 0.5}}{\sqrt{(2R_{800} + 1)^2 - (6R_{800} - 5\sqrt{R_{670}}) - 0.5}}$                                     | Haboudane <i>et al.</i> (2004) <sup>6</sup>          |
| Modified Chlorophyll Abs. Index                                                                          | $MCARI = [(R_{700} - R_{670}) - 0.2(R_{700} - R_{550})] \cdot (R_{700}/R_{670})$                                                                                                | Haboudane <i>et al.</i> (2004) <sup>6</sup>          |
| Modified Chlorophyll Abs. Index 1                                                                        | $MCARI1 = \frac{1.2[2.5(R_{800} - R_{670}) - 1.3(R_{800} - R_{550})]}{1.5[2.5(R_{800} - R_{670}) - 1.3(R_{800} - R_{550})]}$                                                    | Haboudane <i>et al.</i> (2004) <sup>6</sup>          |
| Modified Chlorophyll Abs. Index 2                                                                        | $MCARI2 = \frac{1.5[2.5(R_{800} - R_{670}) - 1.3(R_{800} - R_{550})]}{\sqrt{(2R_{800} + 1)^2 - (6R_{800} - 5\sqrt{R_{670}}) - 0.5}}$                                            | Haboudane <i>et al.</i> (2004) <sup>6</sup>          |
| Simple Ratio                                                                                             | $SR = R_{800}/R_{670}$                                                                                                                                                          | Jordan (1969) <sup>7</sup>                           |
| Modified Simple Ratio                                                                                    | $MSR = \frac{R_{800}/R_{670} - 1}{(R_{800}/R_{670})^{0.5} + 1}$                                                                                                                 | Chen (1996) <sup>8</sup>                             |
| Enhanced Vegetation Index                                                                                | $EVI = 2.5 \cdot (R_{800} - R_{670}) / (R_{800} + 6 \cdot R_{670} - 7.5 \cdot R_{800} + 1)$                                                                                     | Liu & Huete (1995) <sup>9</sup>                      |
| <b>Pigment indices</b>                                                                                   |                                                                                                                                                                                 |                                                      |
| <i>Vogelmann indices</i>                                                                                 |                                                                                                                                                                                 |                                                      |
|                                                                                                          | $VOG1 = R_{740}/R_{720}$                                                                                                                                                        | Vogelmann <i>et al.</i> (1993) <sup>10</sup>         |
|                                                                                                          | $VOG2 = (R_{734} - R_{747}) / (R_{715} + R_{726})$                                                                                                                              | Vogelmann <i>et al.</i> (1993) <sup>10</sup>         |
|                                                                                                          | $VOG3 = (R_{734} - R_{747}) / (R_{715} + R_{720})$                                                                                                                              | Vogelmann <i>et al.</i> (1993) <sup>10</sup>         |
| <i>Gitelson &amp; Merzlyak indices</i>                                                                   |                                                                                                                                                                                 |                                                      |
|                                                                                                          | $GM1 = R_{750}/R_{550}$                                                                                                                                                         | Gitelson & Merzlyak (1997) <sup>11</sup>             |
|                                                                                                          | $GM2 = R_{750}/R_{700}$                                                                                                                                                         | Gitelson & Merzlyak (1997) <sup>11</sup>             |
| <i>Transformed Chlorophyll Absorption in Reflectance Index</i>                                           |                                                                                                                                                                                 |                                                      |
|                                                                                                          | $TCARI = 3 \cdot [(R_{700} - R_{670}) - 0.2 \cdot (R_{700} - R_{550}) \cdot (R_{700}/R_{670})]$                                                                                 | Haboudane <i>et al.</i> (2002) <sup>12</sup>         |
| <i>Transformed Chlorophyll Absorption in Reflectance Index/ Optimised Soil-Adjusted Vegetation Index</i> |                                                                                                                                                                                 |                                                      |
|                                                                                                          | $TCARI/OSAVI = \frac{3 \cdot [(R_{700} - R_{670}) - 0.2 \cdot (R_{700} - R_{550}) \cdot (R_{700}/R_{670})]}{(1 + 0.16) \cdot (R_{800} - R_{670}) / (R_{800} + R_{670} + 0.16)}$ | Haboudane <i>et al.</i> (2002) <sup>12</sup>         |
| <i>Chlorophyll Index Red Edge</i>                                                                        |                                                                                                                                                                                 |                                                      |
|                                                                                                          | $CI = R_{750}/R_{710}$                                                                                                                                                          | Haboudane <i>et al.</i> (2002) <sup>12</sup>         |
| <i>Simple Ratio Pigment Index</i>                                                                        |                                                                                                                                                                                 |                                                      |
|                                                                                                          | $SRPI = R_{430}/R_{680}$                                                                                                                                                        | Peñuelas <i>et al.</i> (1995) <sup>13</sup>          |
|                                                                                                          |                                                                                                                                                                                 | Barnes <i>et al.</i> (1992) <sup>14</sup>            |
| <i>Normalised Phaeophytinization Index</i>                                                               |                                                                                                                                                                                 |                                                      |
|                                                                                                          | $NPQI = (R_{415} - R_{435}) / (R_{415} + R_{435})$                                                                                                                              | Peñuelas <i>et al.</i> (1995) <sup>13</sup>          |
|                                                                                                          |                                                                                                                                                                                 | Barnes <i>et al.</i> , 1992) <sup>14</sup>           |
| <i>Normalised Pigments Index</i>                                                                         |                                                                                                                                                                                 |                                                      |
|                                                                                                          | $NPCI = (R_{680} - R_{430}) / (R_{680} + R_{430})$                                                                                                                              | Peñuelas <i>et al.</i> (1995) <sup>13</sup>          |
| <i>Carter indices</i>                                                                                    |                                                                                                                                                                                 |                                                      |
|                                                                                                          | $CTR11 = R_{695}/R_{420}$                                                                                                                                                       | Carter (1994) <sup>15</sup>                          |
|                                                                                                          | $CAR = R_{695}/R_{760}$                                                                                                                                                         | Carter <i>et al.</i> (1996) <sup>16</sup>            |
| <i>Reflectance band ratio indices</i>                                                                    |                                                                                                                                                                                 |                                                      |
|                                                                                                          | $DCabCxc = R_{672} / (R_{550} \cdot 3R_{708})$                                                                                                                                  | Datt <i>et al.</i> (1998) <sup>17</sup>              |
|                                                                                                          | $DNIRCabCxc = R_{860} / (R_{550} \cdot R_{708})$                                                                                                                                | Datt <i>et al.</i> (1998) <sup>17</sup>              |
| <i>Structure-Intensive Pigment Index</i>                                                                 |                                                                                                                                                                                 |                                                      |
|                                                                                                          | $SIP1 = (R_{800} - R_{445}) / (R_{800} + R_{680})$                                                                                                                              | Peñuelas <i>et al.</i> (1995) <sup>13</sup>          |
| <i>Carotenoid Reflectance Indices</i>                                                                    |                                                                                                                                                                                 |                                                      |
|                                                                                                          | $CRI_{550} = (1/R_{510}) - (1/R_{550})$                                                                                                                                         | Gitelson <i>et al.</i> (2003; 2006) <sup>18,19</sup> |
|                                                                                                          | $CRI_{700} = (1/R_{510}) - (1/R_{700})$                                                                                                                                         | Gitelson <i>et al.</i> (2003; 2006) <sup>18,19</sup> |
|                                                                                                          | $CRI_{550,515} = (1/R_{515}) - (1/R_{550})$                                                                                                                                     | Gitelson <i>et al.</i> (2006) <sup>19</sup>          |
|                                                                                                          | $CRI_{700,515} = (1/R_{515}) - (1/R_{700})$                                                                                                                                     | Gitelson <i>et al.</i> (2006) <sup>19</sup>          |
|                                                                                                          | $RNIR \cdot CRI_{550} = (1/R_{510}) - (1/R_{550}) \cdot R_{770}$                                                                                                                | Gitelson <i>et al.</i> (2003; 2006) <sup>18,19</sup> |
|                                                                                                          | $RNIR \cdot CRI_{700} = (1/R_{510}) - (1/R_{700}) \cdot R_{770}$                                                                                                                | Gitelson <i>et al.</i> (2003; 2006) <sup>18,19</sup> |
| <i>Plant Senescencing Reflectance Index</i>                                                              |                                                                                                                                                                                 |                                                      |
|                                                                                                          | $PSRI = (R_{680} - R_{500}) / R_{750}$                                                                                                                                          | Merzlyak <i>et al.</i> (1999) <sup>20</sup>          |

|                                             |                                                                                                                                      |                                                                                                                                                          |
|---------------------------------------------|--------------------------------------------------------------------------------------------------------------------------------------|----------------------------------------------------------------------------------------------------------------------------------------------------------|
| Pigment Specific Simple Ratio Chlorophyll a | $PSSRa = R_{800}/R_{675}$                                                                                                            | Blackburn (1998) <sup>21</sup>                                                                                                                           |
| Pigment Spec. Simple Ratio Chl. b           | $PSSRb = R_{800}/R_{650}$                                                                                                            | Blackburn (1998) <sup>21</sup>                                                                                                                           |
| Pigment Specific Simple Ratio Carot.        | $PSRRc = R_{800}/R_{500}$                                                                                                            | Blackburn (1998) <sup>21</sup>                                                                                                                           |
| Pigment Specific Normalised Difference      | $PSNDC = (R_{800} - R_{470})/(R_{800} + R_{470})$                                                                                    | Blackburn (1998) <sup>21</sup>                                                                                                                           |
| <b>Xanthophyll indices</b>                  |                                                                                                                                      |                                                                                                                                                          |
| Photochemical Refl. Index (570)             | $PRI_{570} = (R_{570} - R_{531})/(R_{570} + R_{531})$                                                                                | Gamon <i>et al.</i> (1992) <sup>22</sup>                                                                                                                 |
| Photochemical Refl. Index (515)             | $PRI_{515} = (R_{515} - R_{531})/(R_{515} + R_{531})$                                                                                | Hernández-Clemente <i>et al.</i> (2011) <sup>23</sup>                                                                                                    |
| Photochemical Refl. Index (512)             | $PRI_{m1} = (R_{512} - R_{531})/(R_{512} + R_{531})$                                                                                 | Hernández-Clemente <i>et al.</i> (2011) <sup>23</sup>                                                                                                    |
| Photochemical Refl. Index (600)             | $PRI_{m2} = (R_{600} - R_{531})/(R_{600} + R_{531})$                                                                                 | Gamon <i>et al.</i> (1992) <sup>22</sup>                                                                                                                 |
| Photochemical Refl. Index (670)             | $PRI_{m3} = (R_{670} - R_{531})/(R_{670} + R_{531})$                                                                                 | Gamon <i>et al.</i> (1992) <sup>22</sup>                                                                                                                 |
| Photochemical Refl. Index (670 and 570)     | $PRI_{m4} = (R_{570} - R_{531} - R_{670})/(R_{570} + R_{531} + R_{670})$                                                             | Hernández-Clemente <i>et al.</i> (2011) <sup>23</sup>                                                                                                    |
| Normalised Photoch. Refl. Index             | $PRI_n = PRI_{570}/[RDVI \cdot (R_{700}/R_{670})]$                                                                                   | Zarco-Tejada <i>et al.</i> (2013) <sup>24</sup>                                                                                                          |
| Carotenoid/Chlorophyll Ratio Index          | $PRI \cdot CI = (R_{570} - R_{530})/(R_{570} + R_{530}) \cdot ((R_{760}/R_{700}) - 1)$                                               | Garrity <i>et al.</i> (2011) <sup>25</sup>                                                                                                               |
| <b>R/G/B indices</b>                        |                                                                                                                                      |                                                                                                                                                          |
| Redness Index                               | $R = R_{700}/R_{670}$                                                                                                                | Gitelson <i>et al.</i> (2000) <sup>26</sup>                                                                                                              |
| Greenness Index                             | $G = R_{570}/R_{670}$                                                                                                                | Calderon <i>et al.</i> (2013) <sup>27</sup>                                                                                                              |
| Blue Index                                  | $B = R_{450}/R_{490}$                                                                                                                | Calderon <i>et al.</i> (2013) <sup>27</sup>                                                                                                              |
| Blue/green indices                          | $BGI1 = R_{400}/R_{550}$<br>$BGI2 = R_{450}/R_{550}$                                                                                 | Zarco-Tejada <i>et al.</i> (2005) <sup>28</sup><br>Zarco-Tejada <i>et al.</i> (2005) <sup>28</sup>                                                       |
| Blue/red indices                            | $BR11 = R_{400}/R_{690}$<br>$BR12 = R_{450}/R_{690}$                                                                                 | Zarco-Tejada <i>et al.</i> (2012) <sup>29</sup><br>Zarco-Tejada <i>et al.</i> (2012) <sup>29</sup>                                                       |
| BF1                                         | $BF1 = R_{400}/R_{410}$                                                                                                              | Zarco-Tejada <i>et al.</i> (2018) <sup>30</sup>                                                                                                          |
| BF2                                         | $BF2 = R_{400}/R_{420}$                                                                                                              | Zarco-Tejada <i>et al.</i> (2018) <sup>30</sup>                                                                                                          |
| BF3                                         | $BF3 = R_{400}/R_{430}$                                                                                                              | Zarco-Tejada <i>et al.</i> (2018) <sup>30</sup>                                                                                                          |
| BF4                                         | $BF4 = R_{400}/R_{440}$                                                                                                              | Zarco-Tejada <i>et al.</i> (2018) <sup>30</sup>                                                                                                          |
| BF5                                         | $BF5 = R_{400}/R_{450}$                                                                                                              | Zarco-Tejada <i>et al.</i> (2018) <sup>30</sup>                                                                                                          |
| Red/green indices                           | $RGI = R_{690}/R_{550}$                                                                                                              | Zarco-Tejada <i>et al.</i> (2005) <sup>28</sup>                                                                                                          |
| Ratio Analysis of Reflectance Spectra       | $RARS = R_{746}/R_{513}$                                                                                                             | Chappelle <i>et al.</i> (1992) <sup>31</sup>                                                                                                             |
| Lichtenthaler Index                         | $LIC1 = (R_{800} - R_{680})/(R_{800} + R_{680})]$<br>$LIC2 = R_{440}/R_{690}$<br>$LIC3 = R_{440}/R_{740}$                            | Lichtenthaler <i>et al.</i> (1996) <sup>32</sup><br>Lichtenthaler <i>et al.</i> (1996) <sup>32</sup><br>Lichtenthaler <i>et al.</i> (1996) <sup>32</sup> |
| <b>Chlorophyll fluorescence</b>             |                                                                                                                                      |                                                                                                                                                          |
| Reflectance Curvature Index                 | $CUR = (R_{675} \cdot R_{690})/R_{683}^2$                                                                                            | Zarco-Tejada <i>et al.</i> (2000) <sup>33</sup><br>Plascyk (1975) <sup>34</sup>                                                                          |
| Fraunhofer Line Depth (FLD) principle       | $FLD = \frac{E_{out} \cdot L_{in} - E_{in} \cdot L_{out}}{E_{out} - E_{in}}$                                                         | see Mohammed <i>et al.</i> (2019) <sup>35</sup>                                                                                                          |
| <b>Plant disease index</b>                  |                                                                                                                                      |                                                                                                                                                          |
| Healthy-index                               | $HI = \frac{(R_{534} - R_{698})}{R_{534} + R_{698}} - \frac{1}{2} \cdot R_{704}$                                                     | Mahlein <i>et al.</i> (2012) <sup>36</sup>                                                                                                               |
| <b>Thermal index</b>                        |                                                                                                                                      |                                                                                                                                                          |
| Crop Water Stress Index (CWSI)              | $CWSI = \frac{(T_c - T_a) - (T_c - T_a)_{LL}}{(T_c - T_a)_{UL} - (T_c - T_a)_{LL}}$<br>LL, UL = lower and upper limits, respectively | Idso <i>et al.</i> (1981) <sup>37</sup>                                                                                                                  |

**Supplementary Table 2. Primer sequences for the PCR and qPCR techniques used for *Verticillium dahliae* (Vd) and *Xylella fastidiosa* (Xf) in this study.**

| Protocol | Target Pathogen      | Primers             | Sequence                                |
|----------|----------------------|---------------------|-----------------------------------------|
| PCR      | <i>V. dahliae</i>    | Forward primer DB19 | 5'-CGGTGACATAATACTGAGAG-3'              |
|          |                      | Reverse primer DB22 | 5'-GACGATGCGGATTGAACGAA-3'              |
|          |                      | Internal primer     | 5'-TGAGACTCGGCTGCCACAC-3'               |
| qPCR     | <i>X. fastidiosa</i> | Forward primer XF-F | 5'-CACGGCTGGTAACGGAAGA-3'               |
|          |                      | Reverse primer XF-R | 5'-GGGTTGCGTGGTGAAATCAAG-3'             |
|          |                      | Probe XF-P          | 5'-6-FAM-TCGCATCCCGTGGCTCAGTCC-BHQ-1-3' |

**Supplementary Table 3. Values and ranges used for the model inversion and look-up-table (LUT) generation for the PROSAIL (PROSPECT-D + 4SAIL) radiative transfer model.**

| Parameter                                         | Abbreviation      | Value / range |
|---------------------------------------------------|-------------------|---------------|
| Chlorophyll content [ $\mu\text{g}/\text{cm}^2$ ] | $C_{a+b}$         | 10–70         |
| Carotenoid content [ $\mu\text{g}/\text{cm}^2$ ]  | $C_{x+c}$         | 0–20          |
| Anthocyanin content [ $\mu\text{g}/\text{cm}^2$ ] | Anth              | 0–7.5         |
| Dry matter content [ $\text{g}/\text{cm}^2$ ]     | $C_m$             | 0.012         |
| Water content [ $\text{g}/\text{cm}^2$ ]          | $C_w$             | 0.009         |
| Mesophyll struct. coeff.                          | N                 | 1–2.5         |
| Leaf Area Index [ $\text{m}^2/\text{m}^2$ ]       | LAI               | 0.3–5         |
| Average leaf angle [deg.]                         | Lidf <sub>a</sub> | 0–90          |
| Hot spot parameter                                | Hot               | 0.01          |
| Soil reflectance                                  | $R_{\text{soil}}$ | -             |
| Observer angle [deg.]                             | tto               | 0             |
| Sun zenith angle [deg.]                           | tts               | 0–53.75       |
| Relative azimuth angle [deg.]                     | psi               | 0             |

### Supplementary References

1. Rouse, J. W., Jr., Haas, R. H., Schell, J. A. & Deering, D. W. Monitoring Vegetation Systems in the Great Plains with Ertis. *NASA Special Publication* **351**, 309 (1974).
2. Roujean, J.-L. & Breon, F.-M. Estimating PAR absorbed by vegetation from bidirectional reflectance measurements. *Remote Sensing of Environment* **51**, 375–384 (1995).
3. Rondeaux, G., Steven, M. & Baret, F. Optimization of soil-adjusted vegetation indices. *Remote Sensing of Environment* **55**, 95–107 (1996).
4. Qi, J., Chehbouni, A., Huete, A. R., Kerr, Y. H. & Sorooshian, S. A modified soil adjusted vegetation index. *Remote Sensing of Environment* **48**, 119–126 (1994).

5. Broge, N. H. & Leblanc, E. Comparing prediction power and stability of broadband and hyperspectral vegetation indices for estimation of green leaf area index and canopy chlorophyll density. *Remote Sensing of Environment* **76**, 156–172 (2001).
6. Haboudane, D., Miller, J. R., Pattey, E., Zarco-Tejada, P. J. & Strachan, I. B. Hyperspectral vegetation indices and novel algorithms for predicting green LAI of crop canopies: Modeling and validation in the context of precision agriculture. *Remote Sensing of Environment* **90**, 337–352 (2004).
7. Jordan, C. F. Derivation of Leaf-Area Index from Quality of Light on the Forest Floor. *Ecology* **50**, 663–666 (1969).
8. Chen, J. M. Evaluation of Vegetation Indices and a Modified Simple Ratio for Boreal Applications. *Canadian Journal of Remote Sensing* **22**, 229–242 (1996).
9. Liu, H. Q. & Huete, A. Feedback based modification of the NDVI to minimize canopy background and atmospheric noise. *IEEE Transactions on Geoscience and Remote Sensing* **33**, 457–465 (1995).
10. Vogelmann, T. C. Plant Tissue Optics. *Annu. Rev. Plant. Physiol. Plant. Mol. Biol.* **44**, 231–251 (1993).
11. Gitelson, A. A. & Merzlyak, M. N. Signature Analysis of Leaf Reflectance Spectra: Algorithm Development for Remote Sensing of Chlorophyll. *Journal of Plant Physiology* **148**, 494–500 (1996).
12. Haboudane, D., Miller, J. R., Tremblay, N., Zarco-Tejada, P. J. & Dextraze, L. Integrated narrow-band vegetation indices for prediction of crop chlorophyll content for application to precision agriculture. *Remote Sensing of Environment* **81**, 416–426 (2002).
13. Penuelas, J., Frederic, B. & Filella, I. *Semi-Empirical Indices to Assess Carotenoids/Chlorophyll-a Ratio from Leaf Spectral Reflectance*. vol. 31 (1995).
14. Barnes, J. D., Balaguer, L., Manrique, E., Elvira, S. & Davison, A. W. A reappraisal of the use of DMSO for the extraction and determination of chlorophylls a and b in lichens and higher plants. *Environmental and Experimental Botany* **32**, 85–100 (1992).
15. Carter, G. A. Ratios of leaf reflectances in narrow wavebands as indicators of plant stress. *International Journal of Remote Sensing* **15**, 697–703 (1994).
16. Carter, G. A., Dell, T. R. & Cibula, W. G. Spectral reflectance characteristics and digital imagery of a pine needle blight in the southeastern United States. *Canadian journal of forest research* (1996).
17. Datt, B. Remote Sensing of Chlorophyll a, Chlorophyll b, Chlorophyll a+b, and Total Carotenoid Content in Eucalyptus Leaves. *Remote Sensing of Environment* **66**, 111–121 (1998).
18. Gitelson, A. A., Gritz †, Y. & Merzlyak, M. N. Relationships between leaf chlorophyll content and spectral reflectance and algorithms for non-destructive chlorophyll assessment in higher plant leaves. *Journal of Plant Physiology* **160**, 271–282 (2003).
19. Gitelson, A. A., Keydan, G. P. & Merzlyak, M. N. Three-band model for noninvasive estimation of chlorophyll, carotenoids, and anthocyanin contents in higher plant leaves. *Geophys. Res. Lett.* **33**, L11402 (2006).
20. Merzlyak, M. N., Gitelson, A. A., Chivkunova, O. B. & Rakitin, V. YU. Non-destructive optical detection of pigment changes during leaf senescence and fruit ripening. *Physiologia Plantarum* **106**, 135–141 (1999).
21. Blackburn, G. A. Spectral indices for estimating photosynthetic pigment concentrations: A test using senescent tree leaves. *International Journal of Remote Sensing* **19**, 657–675 (1998).

22. Gamon, J. A., Peñuelas, J. & Field, C. B. A narrow-waveband spectral index that tracks diurnal changes in photosynthetic efficiency. *Remote Sensing of Environment* **41**, 35–44 (1992).
23. Hernández-Clemente, R., Navarro-Cerrillo, R. M., Suárez, L., Morales, F. & Zarco-Tejada, P. J. Assessing structural effects on PRI for stress detection in conifer forests. *Remote Sensing of Environment* **115**, 2360–2375 (2011).
24. Zarco-Tejada, P. J., Morales, A., Testi, L. & Villalobos, F. J. Spatio-temporal patterns of chlorophyll fluorescence and physiological and structural indices acquired from hyperspectral imagery as compared with carbon fluxes measured with eddy covariance. *Remote Sensing of Environment* **133**, 102–115 (2013).
25. Garrity, S. R., Eitel, J. U. H. & Vierling, L. A. Disentangling the relationships between plant pigments and the photochemical reflectance index reveals a new approach for remote estimation of carotenoid content. *Remote Sensing of Environment* **115**, 628–635 (2011).
26. Gitelson, A. A. *et al.* Remote Estimation of Phytoplankton Density in Productive Waters. *Arch. Hydrobiol. Spec. Issues Advanc. Limnol. Limnology and Lake Management 2000+* **55**, 121–136 (2000).
27. Calderón, R., Navas-Cortés, J. A., Lucena, C. & Zarco-Tejada, P. J. High-resolution airborne hyperspectral and thermal imagery for early detection of Verticillium wilt of olive using fluorescence, temperature and narrow-band spectral indices. *Remote Sensing of Environment* **139**, 231–245 (2013).
28. Zarco-Tejada, P. J. *et al.* Assessing vineyard condition with hyperspectral indices: Leaf and canopy reflectance simulation in a row-structured discontinuous canopy. *Remote Sensing of Environment* **99**, 271–287 (2005).
29. Zarco-Tejada, P. J., González-Dugo, V. & Berni, J. A. J. Fluorescence, temperature and narrow-band indices acquired from a UAV platform for water stress detection using a micro-hyperspectral imager and a thermal camera. *Remote Sensing of Environment* **117**, 322–337 (2012).
30. Zarco-Tejada, P. J. *et al.* Previsual symptoms of Xylella fastidiosa infection revealed in spectral plant-trait alterations. *Nature Plants* (2018) doi:10.1038/s41477-018-0189-7.
31. Chappelle, E. W., Kim, M. S. & McMurtrey, J. E. Ratio analysis of reflectance spectra (RARS): An algorithm for the remote estimation of the concentrations of chlorophyll A, chlorophyll B, and carotenoids in soybean leaves. *Remote Sensing of Environment* **39**, 239–247 (1992).
32. Lichtenthaler, H. K. Vegetation Stress: an Introduction to the Stress Concept in Plants. *Journal of Plant Physiology* **148**, 4–14 (1996).
33. Zarco-Tejada, P. J., Miller, J. R., Mohammed, G. H. & Noland, T. L. Chlorophyll Fluorescence Effects on Vegetation Apparent Reflectance: I. Leaf-Level Measurements and Model Simulation. *Remote Sensing of Environment* **74**, 582–595 (2000).
34. Plascyk, J. A. The MK II Fraunhofer Line Discriminator (FLD-II) for Airborne and Orbital Remote Sensing of Solar-Stimulated Luminescence. *OE, OPEGAR* **14**, 144339 (1975).
35. Mohammed, G. H. *et al.* Remote sensing of solar-induced chlorophyll fluorescence (SIF) in vegetation: 50 years of progress. *Remote Sensing of Environment* **231**, 111177 (2019).
36. Mahlein, A.-K., Oerke, E.-C., Steiner, U. & Dehne, H.-W. Recent advances in sensing plant diseases for precision crop protection. *Eur J Plant Pathol* **133**, 197–209 (2012).
37. Idso, S. B., Jackson, R. D., Pinter, P. J., Reginato, R. J. & Hatfield, J. L. Normalizing the stress-degree-day parameter for environmental variability. *Agricultural Meteorology* **24**, 45–55 (1981).
